# Supplementary material
Source: publisher figshare collection journal article supplement (https://acs.figshare.com/ndownloader/files/4600195)

**Supplementary Figure A1 &A2: Semi-quantitative estimation of the expression levels of uPAR protein levels in the HCT116AS<sup>uPAR</sup> versus HCT116 WT cell lines**

**(A1):** 20 µg of cell lysate derived from either the HCT116 AS<sup>uPAR</sup> or HCT116WT cell lines were separated by 10% SDS/PAGE under non-reducing conditions and subjected to immunoblot analysis for uPAR using a monoclonal antibody to uPAR (Cat No. 3936). The blots were subsequently stripped and re-probed for β-actin to confirm equal protein loading and normalization. **(A2):** Semi-quantitative densitometric analysis of the western blot images from 1A after normalization to β-actin. The bar graphs represent the percent decrease in the normalized levels of uPAR in HCT116AS<sup>uPAR</sup> in comparison to HCT116WT (Control). The graph is representative of the data from 3 independent experiments post-normalization to β-actin and the error bars indicate ± SEM. Semi-quantitative analysis indicates that uPAR protein levels in HCT116AS<sup>uPAR</sup> is  $61.9 \pm 1.7\%$  of the control (HT116WT) demonstrating a reduction in uPAR levels of ~ 40%.

Supplementary Figure A1&A2

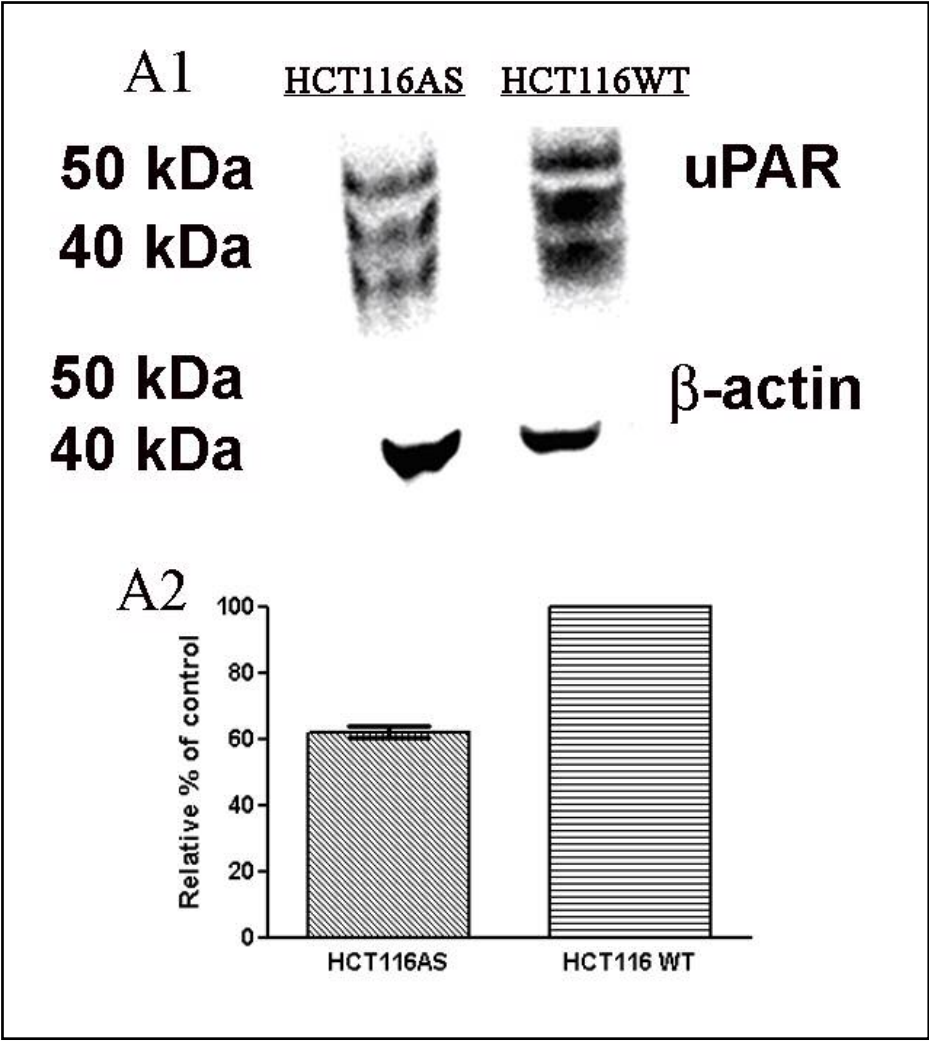

Supplement: Supplementary file 1 [file 4600195]
